# Supplementary material
Source: Springer Nature journal article supplement (https://www.springermedizin.de/resource/supplementary/12936_2013_2791_MOESM4_ESM.pdf/9544246)
Supplement: MOESM4 [file 9544246]

# Population in Nangapanda

(registered N=4606)

Excluded (n= 962) absent or died

## Participants

(registered n=3644)

Excluded no blood samples (n= 1604)

Blood samples collected  
n=2040

Excluded no blood sample for PCR  
(n= 512)

PCR (n=1528)

Excluded microscopy results missing (n=12)

PCR (n=1516)

Excluded inhibitor (n=7)

Analysis (n=1509)
